# Supplementary material for: Photo-immuno nano-bomb for co-delivery of Ce6 and R837 potentiates immunogenic cell death and amplifies anti-tumor efficacy in cutaneous squamous cell carcinoma
Source: Royal Society of Chemistry journal article supplement (doi:10.1039/d5tb02242h), 2025-11-28
Supplement: d5tb02242h1.pdf [file d5tb02242h1.pdf]

## **Supporting information**

### **Photo-Immuno Nano-Bomb for Co-Delivery of Ce6 and R837 Potentiates Immunogenic Cell Death and Amplifies Anti-Tumor Efficacy in Cutaneous Squamous Cell Carcinoma**

Xiaoyan Zhang <sup>a,b</sup>, Jiahui Zhu<sup>c</sup>, Tinghua Li<sup>c</sup>, Huan Cao<sup>c,\*</sup>, Lin Wang<sup>a,\*</sup>

<sup>a</sup> Department of Dermatovenereology, West China Hospital, Sichuan University, Chengdu 610041, China

<sup>b</sup> Department of Dermatology, West China Second University Hospital, Sichuan University; Key Laboratory of Birth Defects and Related Diseases of Women and Children (Sichuan University), Ministry of Education, Sichuan, China, 610041

<sup>c</sup> National Engineering Research Center for Biomaterials, College of Biomedical Materials, Sichuan University, Chengdu 610064, P. R. China

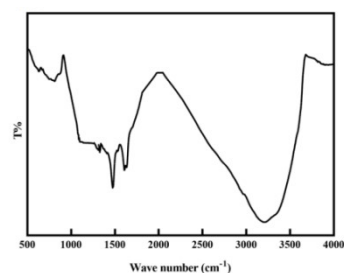

Fig. S1. FTIR spectrum of PDA NPs.

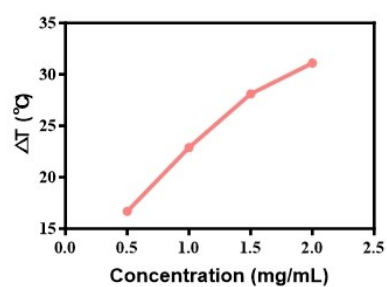

Fig. S2. Temperature increase for different concentrations after PDA-Ce6-R837 NPs +L treatment.

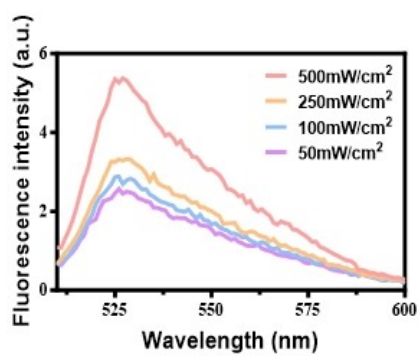

Fig. S3. Variation of SOSG intensity with the change of laser power density after PDA-Ce6-R837 NPs +L treatment.

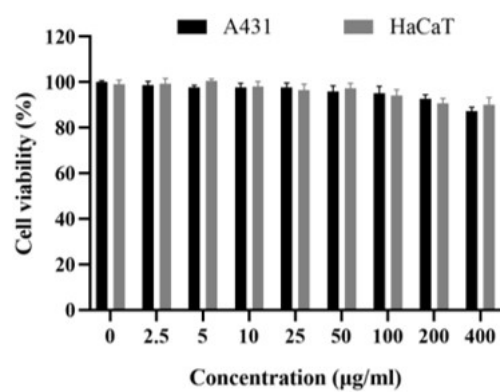

Fig. S4. Cytotoxicity study of PDA NPs on A431 and HaCaT cells.

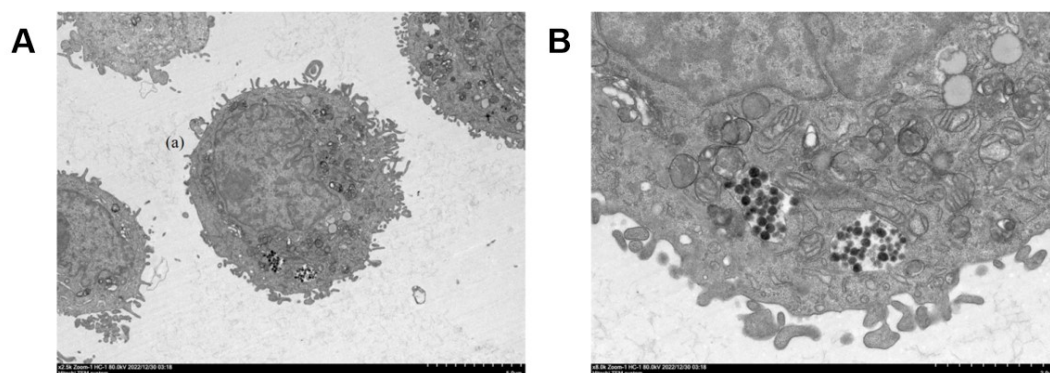

Fig. S5. (A,B) TEM images of intracellular localization of PDA-Ce6-R837 NPs. (a) Scale bar = 50 µm; (b) Scale bar = 20 µm.
